# Supplementary material for: Epigenome Mapping Identifies Tumor-Specific Gene Expression in Primary Rectal Cancer
Source: PubMed Central journal article supplement (PMC6721540; doi:10.3390/cancers11081142), 2019-08-09

# Supplementary Material: Epigenome Mapping Identifies Tumor-Specific Gene Expression in Primary Rectal Cancer

Hannah Flebbe, Feda H. Hamdan, Vijayalakshmi Kari, Julia Kitz, Jochen Gaedcke, B. Michael Ghadimi, Steven A. Johnsen and Marian Grade

**Table S1.** List of the 44 genes with differential H3K27ac occupancy at TSS. Also shown are the *p*-values of the corresponding gene expression differences between tumor and mucosa samples from Gaedcke Colorectal Statistics (Oncomine). n.a., not available.

| Number | Name      | <i>p</i> -Value for Gene Expression Differences |
|--------|-----------|-------------------------------------------------|
| 1      | CASC21    | n. a.                                           |
| 2      | KRT23     | $9.06 \times 10^{-41}$                          |
| 3      | MRPL23    | $3.80 \times 10^{-10}$                          |
| 4      | PLA2G2E   | 0.043                                           |
| 5      | F7        | $3.16 \times 10^{-10}$                          |
| 6      | LINCO1219 | n. a.                                           |
| 7      | BMP7      | $7.14 \times 10^{-16}$                          |
| 8      | PRSS23    | $2.17 \times 10^{-17}$                          |
| 9      | RETN      | $1.36 \times 10^{-18}$                          |
| 10     | TREM1     | $2.75 \times 10^{-21}$                          |
| 11     | NR_125862 | n. a.                                           |
| 12     | EPHX4     | $1.73 \times 10^{-16}$                          |
| 13     | MMP9      | n. a.                                           |
| 14     | LINCO1101 | n. a.                                           |
| 15     | RBP2      | $5.92 \times 10^{-4}$                           |
| 16     | CXCL6     | $5.73 \times 10^{-17}$                          |
| 17     | LINCO1615 | n. a.                                           |
| 18     | HAL       | $6.86 \times 10^{-9}$                           |
| 19     | MCEMP1    | $2.87 \times 10^{-22}$                          |
| 20     | PRAP1     | $4.91 \times 10^{-25}$                          |
| 21     | EYA1      | $3.44 \times 10^{-4}$                           |
| 22     | CHI3L1    | $3.42 \times 10^{-40}$                          |
| 23     | LGR5      | $1.32 \times 10^{-10}$                          |
| 24     | ADGRG3    | $7.05 \times 10^{-13}$                          |
| 25     | ETV4      | $2.898 \times 10^{-44}$                         |
| 26     | KRT80     | $1.18 \times 10^{-46}$                          |
| 27     | CTHRC1    | $3.71 \times 10^{-30}$                          |
| 28     | TNFRSF10C | $1.10 \times 10^{-19}$                          |
| 29     | PILRB     | 0.785                                           |
| 30     | FOXQ1     | $2.63 \times 10^{-63}$                          |
| 31     | LOC254896 | n. a.                                           |
| 32     | C6orf223  | $6.49 \times 10^{-24}$                          |
| 33     | MROH6     | $7.55 \times 10^{-18}$                          |
| 34     | ASCL2     | $8.24 \times 10^{-52}$                          |
| 35     | EVA1A     | $3.65 \times 10^{-26}$                          |
| 36     | ARNTL2    | $1.68 \times 10^{-35}$                          |
| 37     | LY6E      | $6.16 \times 10^{-28}$                          |
| 38     | SERPINA1  | 0.993                                           |
| 39     | SNTB1     | $2.32 \times 10^{-33}$                          |
| 40     | TGFBI     | $1.28 \times 10^{-50}$                          |
| 41     | PVT1      | $7.75 \times 10^{-29}$                          |
| 42     | S100P     | $5.81 \times 10^{-7}$                           |
| 43     | CXCL1     | $6.45 \times 10^{-31}$                          |
| 44     | RIPK2     | $2.81 \times 10^{-42}$                          |

**Table S2.** Table of GSEA top 50 gene sets enriched in phenotype tumor compared to mucosa. NES, normalized enrichment score; FDR, false discovery rate.

| NO. | Name                                                                       | Size | NES  | FDR <i>q</i> -Value |
|-----|----------------------------------------------------------------------------|------|------|---------------------|
| 1   | NIKOLSKY_BREAST_CANCER_8Q12_Q22_AMPLICON                                   | 105  | 2.67 | 0.000               |
| 2   | NIKOLSKY_BREAST_CANCER_8Q23_Q24_AMPLICON                                   | 135  | 2.57 | 0.000               |
| 3   | SABATES_COLORECTAL_ADENOMA_UP                                              | 117  | 2.50 | 0.000               |
| 4   | NIKOLSKY_BREAST_CANCER_20Q12_Q13_AMPLICON                                  | 117  | 2.49 | 0.000               |
| 5   | RHODES_UNDIFFERENTIATED_CANCER                                             | 67   | 2.19 | 0.000               |
| 6   | GRADE_COLON_AND_RECTAL_CANCER_UP                                           | 269  | 2.13 | 0.000               |
| 7   | VECCHI_GASTRIC_CANCER_EARLY_UP                                             | 390  | 2.11 | 0.000               |
| 8   | BOYALT_LIVER_CANCER_SUBCLASS_G3_UP                                         | 181  | 2.07 | 0.000               |
| 9   | ROSTY_CERVICAL_CANCER_PROLIFERATION_CLUSTER                                | 134  | 2.06 | 0.000               |
| 10  | CHEMNITZ_RESPONSE_TO_PROSTAGLANDIN_E2_UP                                   | 134  | 2.05 | 0.000               |
| 11  | RHODES_CANCER_META_SIGNATURE                                               | 63   | 2.01 | 0.001               |
| 12  | REACTOME_INFLUENZA_LIFE_CYCLE                                              | 131  | 2.00 | 0.001               |
| 13  | REACTOME_PROCESSING_OF_CAPPED_INTRON_CONTAINING_PRE_MRNA                   | 132  | 1.99 | 0.002               |
| 14  | REACTOME_AMYLOIDS                                                          | 68   | 1.98 | 0.002               |
| 15  | REACTOME_3_UTR_MEDIATED_TRANSLATIONAL_REGULATION                           | 103  | 1.97 | 0.002               |
| 16  | SOTIRIOU_BREAST_CANCER_GRADE_1_VS_3_UP                                     | 143  | 1.97 | 0.002               |
| 17  | REACTOME_MEIOTIC_RECOMBINATION                                             | 77   | 1.97 | 0.002               |
| 18  | FISCHER_DREAM_TARGETS                                                      | 902  | 1.95 | 0.003               |
| 19  | PEART_HDAC_PROLIFERATION_CLUSTER_DN                                        | 73   | 1.94 | 0.003               |
| 20  | KEGG_RIBOSOME                                                              | 85   | 1.94 | 0.003               |
| 21  | BURTON_ADIPOGENESIS_PEAK_AT_24HR                                           | 40   | 1.94 | 0.003               |
| 22  | BIDUS_METASTASIS_UP                                                        | 202  | 1.94 | 0.003               |
| 23  | CAIRO_HEPATOBLASTOMA_CLASSES_UP                                            | 567  | 1.93 | 0.003               |
| 24  | REACTOME_RNA_POL_I_TRANSCRIPTION                                           | 82   | 1.93 | 0.003               |
| 25  | REACTOME_PEPTIDE_CHAIN_ELONGATION                                          | 83   | 1.93 | 0.003               |
| 26  | REACTOME_MRNA_PROCESSING                                                   | 152  | 1.92 | 0.003               |
| 27  | REACTOME_RNA_POL_I_PROMOTER_OPENING                                        | 57   | 1.92 | 0.003               |
| 28  | WU_APOPTOSIS_BY_CDKN1A_VIA_TP53                                            | 52   | 1.92 | 0.003               |
| 29  | REACTOME_SRP_DEPENDENT_COTRANSLATIONAL_PROTEIN_TARGETING_TO_MEMBRANE       | 104  | 1.92 | 0.003               |
| 30  | LINDSTEDT_DENDRITIC_CELL_MATURATION_B                                      | 53   | 1.91 | 0.003               |
| 31  | REACTOME_TRANSLATION                                                       | 141  | 1.91 | 0.003               |
| 32  | DUNNE_TARGETS_OF_AML1_MTG8_FUSION_UP                                       | 47   | 1.90 | 0.003               |
| 33  | KANG_DOXORUBICIN_RESISTANCE_UP                                             | 50   | 1.90 | 0.003               |
| 34  | BENPORATH_PROLIFERATION                                                    | 134  | 1.90 | 0.004               |
| 35  | REACTOME_INFLUENZA_VIRAL_RNA_TRANSCRIPTION_AND_REPLICATION                 | 98   | 1.90 | 0.004               |
| 36  | ASTIER_INTEGRIN_SIGNALING                                                  | 51   | 1.88 | 0.005               |
| 37  | LI_AMPLIFIED_IN_LUNG_CANCER                                                | 159  | 1.87 | 0.005               |
| 38  | WINNEPENNINCKX_MELANOMA_METASTASIS_UP                                      | 150  | 1.87 | 0.005               |
| 39  | CROMER_TUMORIGENESIS_UP                                                    | 51   | 1.87 | 0.005               |
| 40  | REACTOME_MRNA_SPLICING                                                     | 104  | 1.87 | 0.005               |
| 41  | REACTOME_DEPOSITION_OF_NEW_CENPA_CONTAINING_NUCLEOSOMES_AT_THE_CENTROMERE  | 58   | 1.87 | 0.005               |
| 42  | REACTOME_FORMATION_OF_THE_TERNARY_COMPLEX_AND_SUBSEQUENTLY_THE_43S_COMPLEX | 48   | 1.87 | 0.005               |
| 43  | SARRIO_EPITHELIAL_MESENCHYMAL_TRANSITION_UP                                | 167  | 1.87 | 0.006               |
| 44  | PUJANA_BRCA2_PCC_NETWORK                                                   | 399  | 1.86 | 0.005               |
| 45  | TIEN_INTESTINE_PROBIOTICS_6HR_UP                                           | 55   | 1.85 | 0.007               |
| 46  | PRAMOONJAGO_SOX4_TARGETS_UP                                                | 50   | 1.84 | 0.007               |
| 47  | VANTVEER_BREAST_CANCER_METASTASIS_DN                                       | 110  | 1.84 | 0.007               |
| 48  | KOBAYASHI_EGFR_SIGNALING_24HR_DN                                           | 241  | 1.84 | 0.007               |
| 49  | DANG_MYC_TARGETS_UP                                                        | 137  | 1.84 | 0.008               |
| 50  | ISHIDA_E2F_TARGETS                                                         | 50   | 1.83 | 0.008               |

**Table S3.** Table of GSEA top 50 gene sets enriched in phenotype mucosa compared to tumor. NES, normalized enrichment score; FDR, false discovery rate.

| NO. | Name                                                        | Size | NES   | FDR q-value |
|-----|-------------------------------------------------------------|------|-------|-------------|
| 1   | SABATES_COLORECTAL_ADENOMA_DN                               | 230  | -3.70 | 0.000       |
| 2   | VECCHI_GASTRIC_CANCER_EARLY_DN                              | 279  | -3.00 | 0.000       |
| 3   | SMID_BREAST_CANCER_LUMINAL_A_UP                             | 69   | -2.69 | 0.000       |
| 4   | SMID_BREAST_CANCER_RELAPSE_IN_LUNG_DN                       | 31   | -2.32 | 0.000       |
| 5   | NAKAYAMA_SOFT_TISSUE_TUMORS_PCA2_DN                         | 69   | -2.21 | 0.001       |
| 6   | DELYS_THYROID_CANCER_DN                                     | 210  | -2.20 | 0.001       |
| 7   | BOQUEST_STEM_CELL_UP                                        | 245  | -2.13 | 0.001       |
| 8   | RICKMAN_HEAD_AND_NECK_CANCER_F                              | 36   | -1.92 | 0.011       |
| 9   | WONG_ENDMETRIUM_CANCER_DN                                   | 72   | -1.88 | 0.016       |
| 10  | REACTOME_NCAM1_INTERACTIONS                                 | 32   | -1.85 | 0.019       |
| 11  | CAIRO_HEPATOBLASTOMA_CLASSES_DN                             | 185  | -1.78 | 0.032       |
| 12  | BROWNE_HCMV_INFECTION_2HR_UP                                | 36   | -1.78 | 0.030       |
| 13  | TURASHVILI_BREAST_DUCTAL_CARCINOMA_VS_LOBULAR_NOR<br>MAL_DN | 60   | -1.78 | 0.029       |
| 14  | WINNEPENNINGCKX_MELANOMA_METASTASIS_DN                      | 38   | -1.76 | 0.034       |
| 15  | TOMLINS_PROSTATE_CANCER_DN                                  | 40   | -1.74 | 0.037       |
| 16  | SIMBULAN_PARP1_TARGETS_UP                                   | 31   | -1.73 | 0.040       |
| 17  | BERTUCCI_INVASIVE_CARCINOMA_DUCTAL_VS_LOBULAR_DN            | 39   | -1.72 | 0.040       |
| 18  | ISSAEVA_ML2_TARGETS                                         | 54   | -1.63 | 0.076       |
| 19  | KEGG_RETINOL_METABOLISM                                     | 35   | -1.63 | 0.076       |
| 20  | KEGG_DRUG_METABOLISM_CYTOCHROME_P450                        | 45   | -1.63 | 0.073       |
| 21  | KEGG_NEUROACTIVE_LIGAND_RECEPTOR_INTERACTION                | 156  | -1.63 | 0.070       |
| 22  | CHEBOTAEV_GR_TARGETS_UP                                     | 72   | -1.62 | 0.070       |
| 23  | NABA_CORE_MATRISOME                                         | 210  | -1.62 | 0.068       |
| 24  | VANHARANTA_UTERINE_FIBROID_DN                               | 63   | -1.62 | 0.067       |
| 25  | MIKKELSEN_MCV6_HCP_WITH_H3K27ME3                            | 298  | -1.60 | 0.072       |
| 26  | KEGG_ALDOSTERONE_REGULATED_SODIUM_REABSORPTION              | 38   | -1.59 | 0.080       |
| 27  | NAKAJIMA_MAST_CELL                                          | 39   | -1.58 | 0.081       |
| 28  | REN_ALVEOLAR_RHABDOMYOSARCOMA_UP                            | 81   | -1.58 | 0.082       |
| 29  | SWEET_LUNG_CANCER_KRAS_DN                                   | 374  | -1.57 | 0.085       |
| 30  | REACTOME_GABA_RECEPTOR_ACTIVATION                           | 38   | -1.56 | 0.091       |
| 31  | EBAUER_MYOGENIC_TARGETS_OF_PAX3_FOXO1_FUSION                | 38   | -1.56 | 0.089       |
| 32  | KONDO_PROSTATE_CANCER_WITH_H3K27ME3                         | 78   | -1.56 | 0.087       |
| 33  | KEGG_ECM_RECEPTOR_INTERACTION                               | 73   | -1.53 | 0.099       |
| 34  | SERVITJA_ISLET_HNF1A_TARGETS_UP                             | 138  | -1.53 | 0.101       |
| 35  | BENPORATH_PRC2_TARGETS                                      | 468  | -1.51 | 0.112       |
| 36  | NABA_ECM_GLYCOPROTEINS                                      | 154  | -1.50 | 0.116       |
| 37  | REACTOME_NUCLEAR_RECEPTOR_TRANSCRIPTION_PATHWAY             | 42   | -1.49 | 0.121       |
| 38  | LEIN_NEURON_MARKERS                                         | 52   | -1.48 | 0.129       |
| 39  | GERHOLD_ADIPOGENESIS_UP                                     | 46   | -1.48 | 0.133       |
| 40  | HOWLIN_CITED1_TARGETS_1_DN                                  | 35   | -1.47 | 0.137       |
| 41  | REACTOME_PHOSPHOLIPASE_C_MEDIATED_CASCADE                   | 44   | -1.47 | 0.136       |
| 42  | ACEVEDO_FGFR1_TARGETS_IN_PROSTATE_CANCER_MODEL_DN           | 258  | -1.46 | 0.138       |
| 43  | LIU_PROSTATE_CANCER_DN                                      | 434  | -1.42 | 0.181       |
| 44  | BOYAULT_LIVER_CANCER_SUBCLASS_G123_DN                       | 46   | -1.42 | 0.181       |
| 45  | REACTOME_MUSCLE_CONTRACTION                                 | 35   | -1.41 | 0.189       |
| 46  | NABA_COLLAGENS                                              | 35   | -1.39 | 0.213       |
| 47  | KEGG_METABOLISM_OF_XENOBIOTICS_BY_CYTOCHROME_P450           | 45   | -1.39 | 0.209       |
| 48  | NABA_ECM_AFFILIATED                                         | 123  | -1.37 | 0.232       |
| 49  | HOWLIN_PUBERTAL_MAMMARY_GLAND                               | 59   | -1.37 | 0.230       |
| 50  | YAO_HOXA10_TARGETS_VIA_PROGESTERONE_UP                      | 68   | -1.37 | 0.227       |

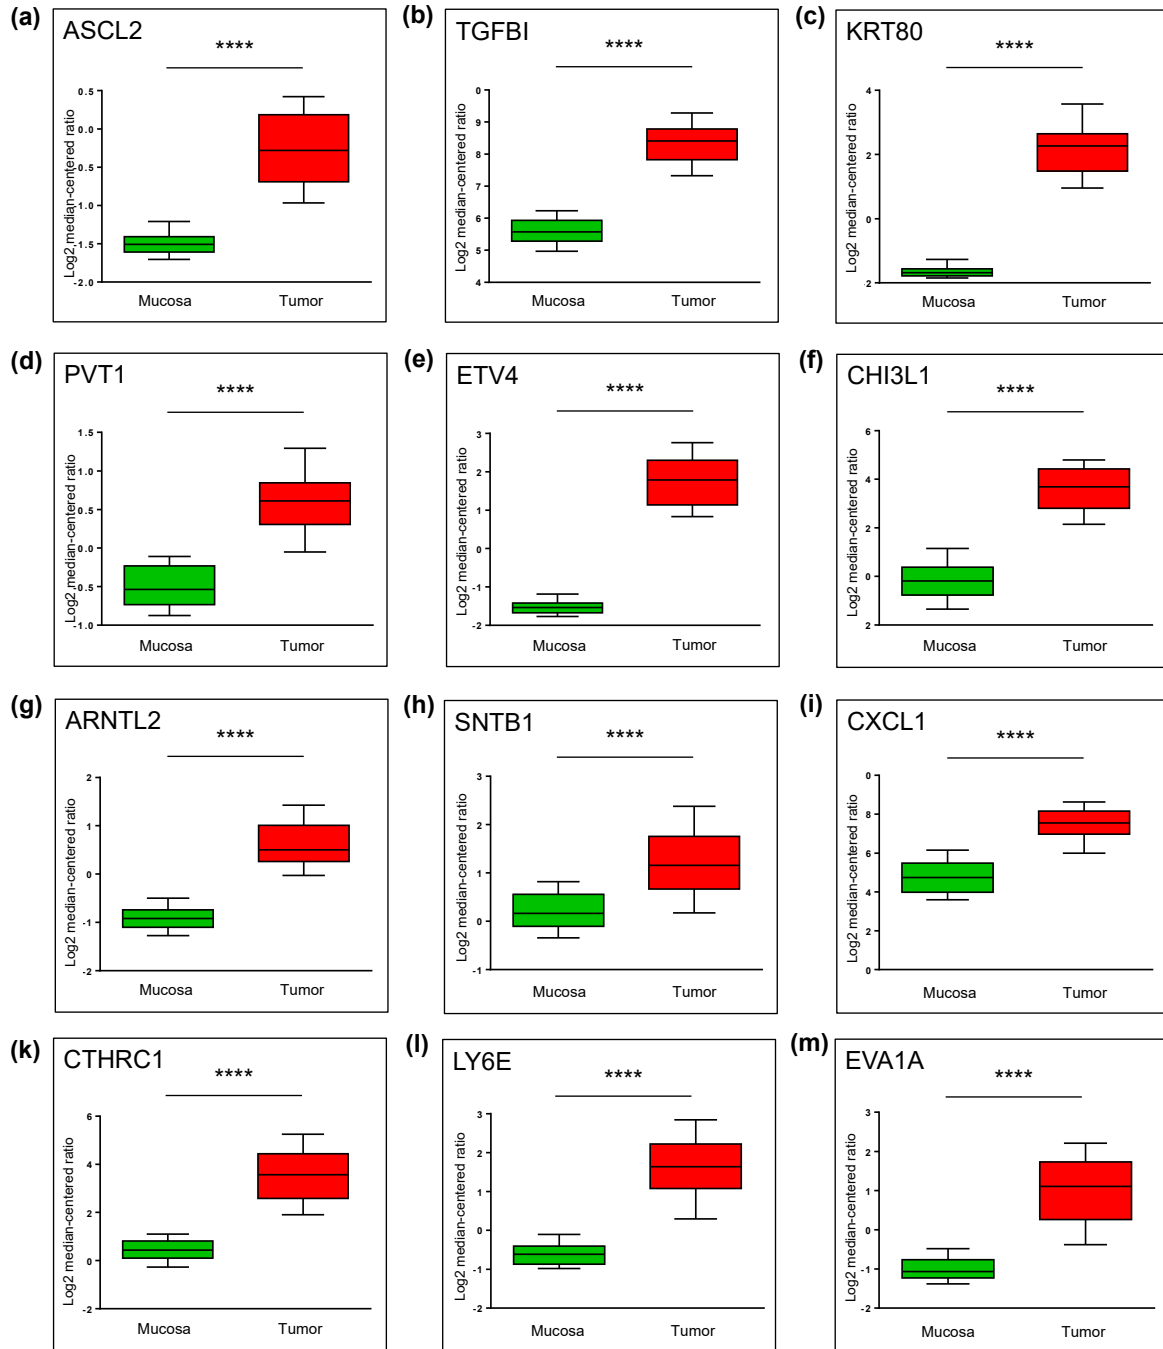

**Figure S1.** Graphical presentation of the mRNA levels of 12 additional differentially enriched genes (from Oncomine, Gaedcke Colorectal Statistics). Whiskers demonstrate the data from 10 to 90 percentiles.  $n = 130$ .  $p$ -values are listed in Table S1. \*\*\*\*  $p < 0.0001$ .

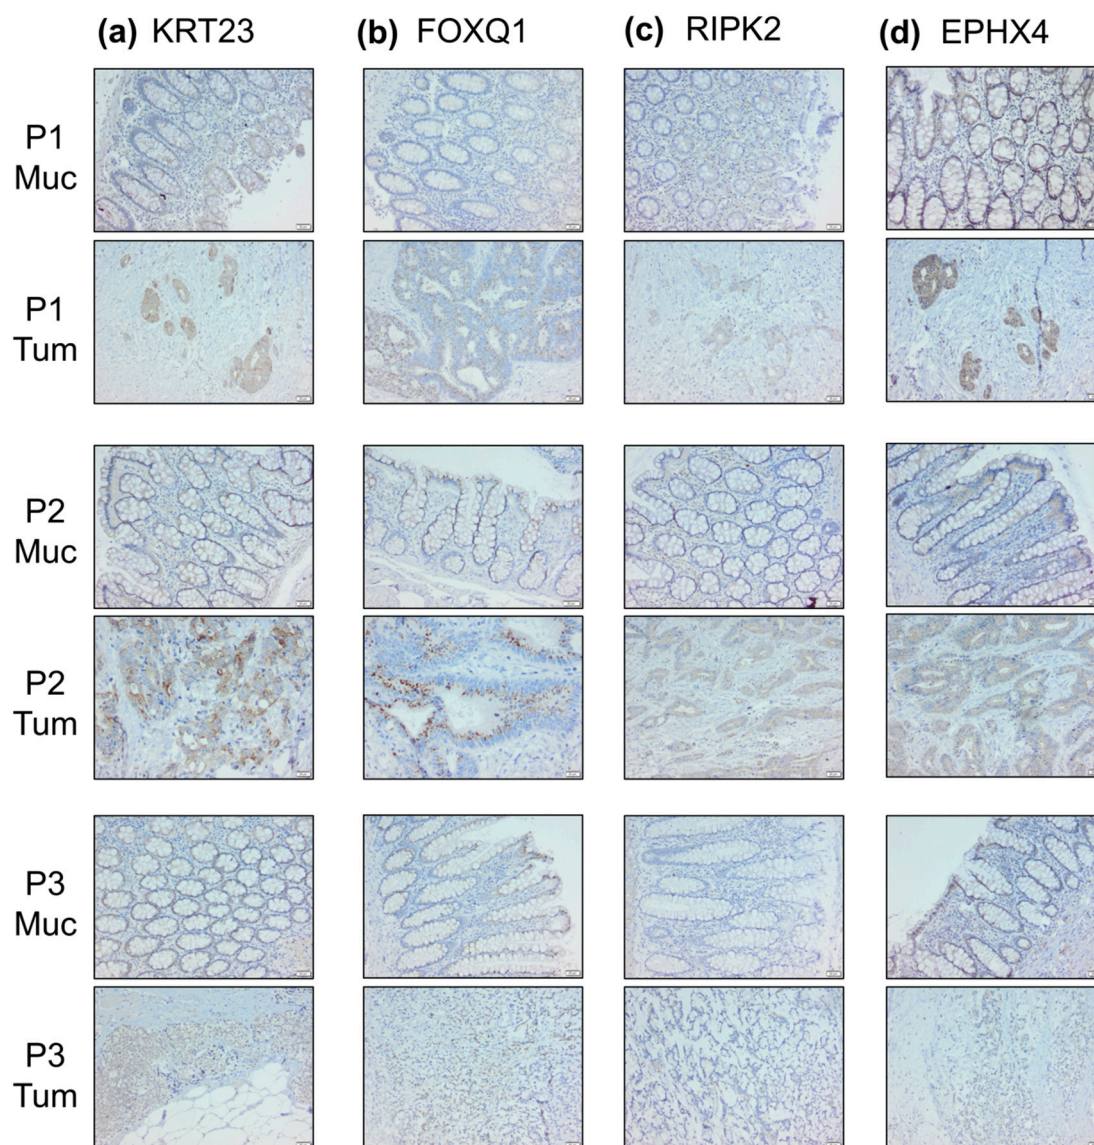

**Figure S2.** Immunohistochemical staining of KRT23 (a), FOXQ1 (b), RIPK2 (c), and EPHX4 (d) for patients P1–P3. Scale bar: 20  $\mu$ m.

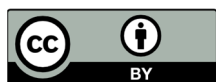

Supplement: cancers-11-01142-s001.pdf [file cancers-11-01142-s001.pdf]
